# Supplementary material for: Evaluation of Helium Ion Radiotherapy in Combination with Gemcitabine in Pancreatic Cancer In Vitro
Source: MDPI journal article supplement (doi:10.3390/cancers16081497), 2024-04-14
Supplement: s1 [file s1]

**Table S1:** Evaluation of the therapeutic effect for each dose after combination of gemcitabine treatment with photon irradiation. We abbreviated every single dose as RT(dose1)ChT(dose2) : Dose 1 shows the radiation dose and dose 2 the gemcitabine dose.

|               |          |             |
|---------------|----------|-------------|
| <b>AsPC-1</b> | RT2ChT10 | independent |
|               | RT4ChT10 | independent |
|               | RT6ChT10 | independent |
|               | RT2ChT50 | additive    |
|               | RT4ChT50 | additive    |
|               | RT6ChT50 | independent |
| <b>BxPC-3</b> | RT2ChT10 | independent |
|               | RT4ChT10 | additive    |
|               | RT6ChT10 | independent |
|               | RT2ChT50 | additive    |
|               | RT4ChT50 | additive    |
|               | RT6ChT50 | additive    |
| <b>Panc-1</b> | RT2ChT10 | independent |
|               | RT4ChT10 | independent |
|               | RT6ChT10 | independent |
|               | RT2ChT50 | independent |
|               | RT4ChT50 | independent |
|               | RT6ChT50 | independent |

**Table S2:** Evaluation of the therapeutic effect for each dose after combination of gemcitabine treatment with helium ion irradiation. We abbreviated every single dose as He(dose1)ChT(dose2) : Dose 1 shows the helium ion radiation dose and dose 2 the gemcitabine dose.

|               |          |             |
|---------------|----------|-------------|
| <b>AsPC-1</b> | He1ChT10 | additive    |
|               | He2ChT10 | additive    |
|               | He3ChT10 | independent |
|               | He1ChT50 | additive    |
|               | He2ChT50 | additive    |
|               | He3ChT50 | independent |
| <b>BxPC-3</b> | He1ChT10 | additive    |
|               | He2ChT10 | additive    |
|               | He3ChT10 | additive    |
|               | He1ChT50 | additive    |
|               | He2ChT50 | additive    |
|               | He3ChT50 | additive    |
| <b>Panc-1</b> | He1ChT10 | independent |
|               | He2ChT10 | independent |
|               | He3ChT10 | independent |
|               | He1ChT50 | additive    |
|               | He2ChT50 | additive    |
|               | He3ChT50 | additive    |
